# Supplementary material for: Salvia miltiorrhizaandCarthamus tinctoriusExtract Prevents Cardiac Fibrosis and Dysfunction after Myocardial Infarction by Epigenetically Inhibiting Smad3 Expression
Source: Hindawi journal article supplement (doi:10.1155/2019/6479136), 2019-05-30
Supplement: f1 [file 6479136.f1.pdf]

## **Supplementary material**

***Salvia miltiorrhiza* and *Carthamus tinctorius* extract prevents cardiac fibrosis and dysfunction after myocardial infarction by epigenetically inhibiting Smad3 expression**

Jing Yang, Bo Wang, Na Li, Qingqing Zhou, Wenhui Zhou, Zhenzhen Zhan

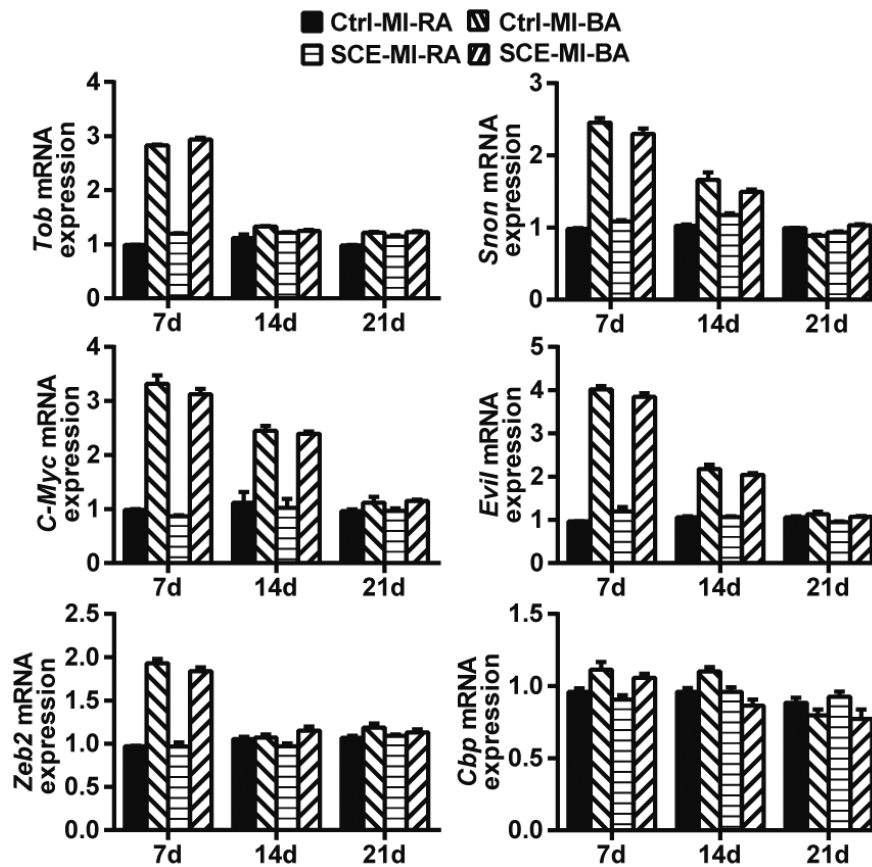

**Figure S1. SCE administration does not affect the expression level of some molecules in the TGF- $\beta$  signaling pathway in heart tissue after MI.**

Mouse heart tissue isolated 7 d, 14 d and 21 d after MI were divided into border area (BA) and remote area (RA) for RNA extraction. Quantitative PCR was performed to analyze mRNA expression changes of *Tob*, *Snon*, *C-Myc*, *Evl*, *Zeb2*, and *Cbp*, which are related to the TGF- $\beta$  signaling pathway. No significant differences were found between the SCE administration group (SCE) and control group (Ctrl). Data are from three independent experiments (mean  $\pm$  SEM).

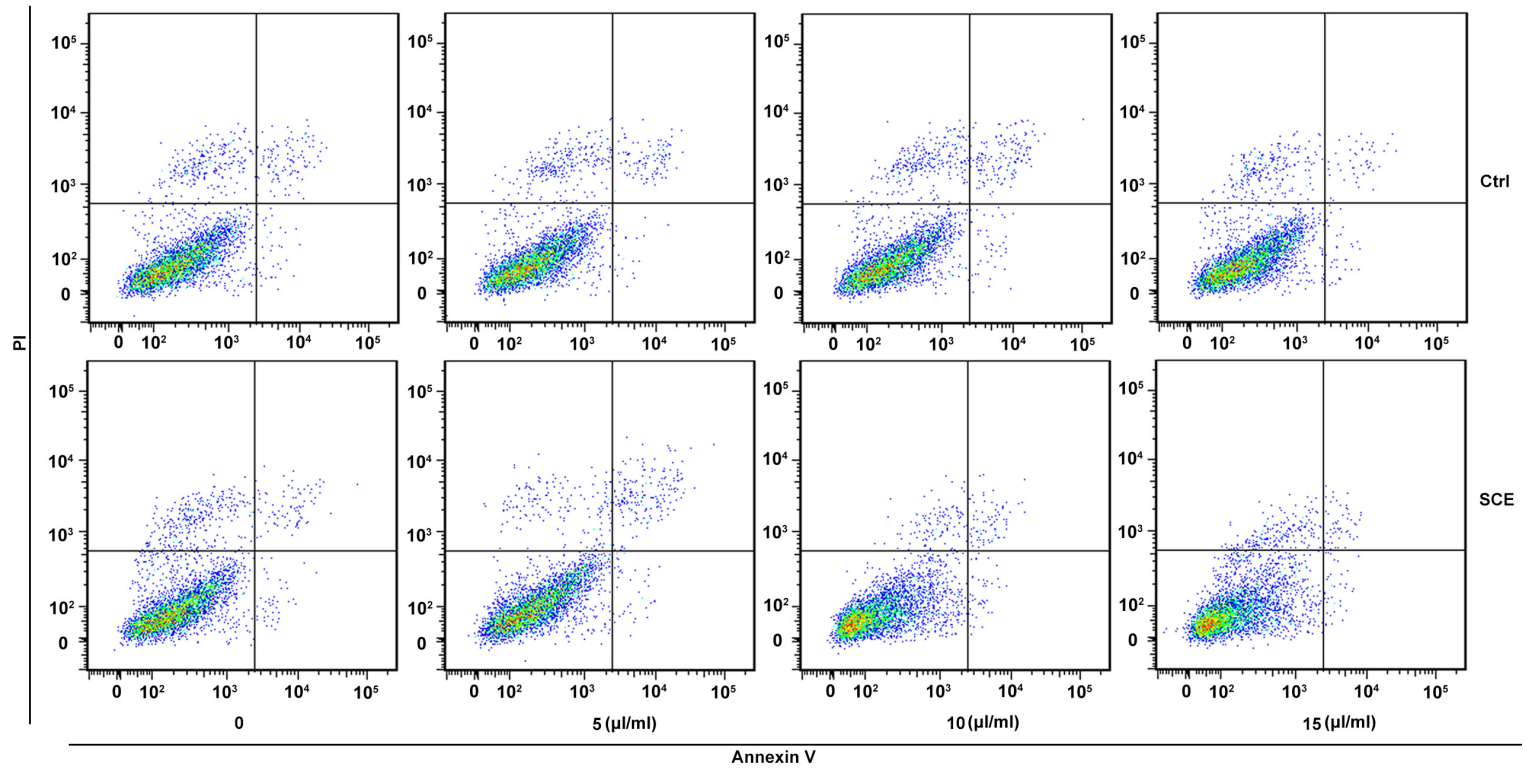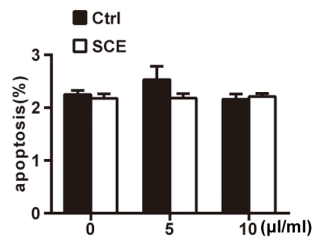

**Figure S2. The treatment of SCE at different concentrations does not induce apoptosis of CFs.**

Primary cardiac fibroblasts were separated from the neonatal mice for culture. The P1 cells were treated with serum-free medium for 24 h first and then were treated with PBS (Ctrl) or SCE at concentrations of 5 μl/ml, 10 μl/ml, and 15 μl/ml for 24 h, respectively. Trypsin-EDTA (2.5%) was then added to digest the SCE-pretreated cells. After 4 min of digestion, the P1 cells were labeled with annexin and PI for 10 min. Then, the difference in cell apoptosis rates between the two groups was analyzed by

flow cytometry. No significant difference in apoptosis was observed in cells with or without SCE administration.

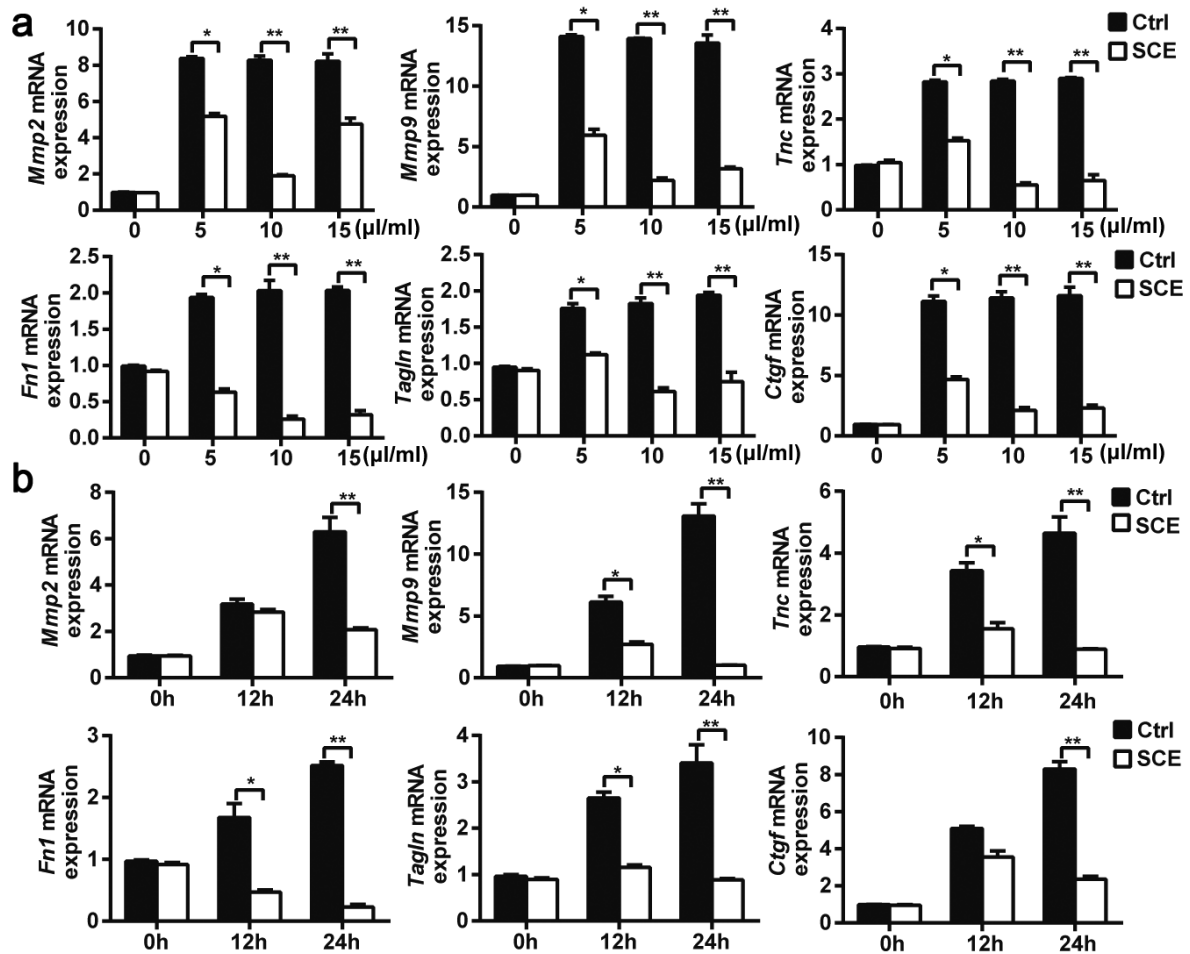

**Figure S3. SCE treatment inhibits the expression of fibrosis-related genes in CFs stimulated with TGF- $\beta$ .**

(a) Primary cardiac fibroblasts isolated from the neonatal mice were treated with serum-free medium for 24 h. After pretreatment with PBS (Ctrl) or SCE at

concentrations of 5  $\mu\text{l/ml}$ , 10  $\mu\text{l/ml}$ , and 15  $\mu\text{l/ml}$  for 30 min, respectively, TGF- $\beta$  (20 ng/ml) was added to stimulate the pretreated cells for 24 h. After RNA extraction, RT-qPCR was performed to determine the expression level of gene mRNA. Expression of matrix metalloproteinase-2 (*Mmp2*), matrix metalloproteinase-9 (*Mmp9*), tenascin (*Tnc*), fibronectin1 (*Fnl*), transgelin (*Tagln*), and connective tissue growth factor (*Ctgf*) were significantly decreased in SCE group as compared with control group. (b) Primary cardiac fibroblasts from the neonatal mice were pretreated with PBS (Ctrl) or SCE (10  $\mu\text{l/ml}$ ) for 30 min, then stimulated with TGF- $\beta$  (20 ng/ml) for 12 h or 24 h. After RNA extraction, RT-qPCR was performed to determine the expression level of gene mRNA. Expression of *Mmp2*, *Mmp9*, *Tnc*, *Fnl*, *Tagln*, and *Ctgf* were significantly decreased in the SCE group as compared with the control group. Data are from three independent experiments (mean  $\pm$  SEM). \* $P < 0.05$ ; \*\* $P < 0.01$ ; Student's *t*-test.

**Supplemental Table 1. Primers for detection of gene expression through RT-qPCR.**

| Genes         |         | Primer sequence (5'.....3') |
|---------------|---------|-----------------------------|
| <i>Il1b</i>   | forward | GTTCCCATTAGACAACACTGCACT    |
|               | reverse | CCACAGGTATTTTGTTCGTTGCT     |
| <i>Il6</i>    | forward | AGACAAAGCCAGAGTCCTTCA       |
|               | reverse | CTTGGTCCTTAGCCACTCCT        |
| <i>Tnf</i>    | forward | GCATGGATCTCAAAGACAACCA      |
|               | reverse | ATGGGCTCATAACCAGGGTTT       |
| <i>Il10</i>   | forward | GCTCTTACTGACTGGCATGAG       |
|               | reverse | CGCAGCTCTAGGAGCATGTG        |
| <i>Colla1</i> | forward | CGATGGATTCCCGTTCGAGT        |
|               | reverse | ATGACTGTCTTGCCCCAAGT        |
| <i>Col3a1</i> | forward | TCCTAACCAAGGCTGCAAGA        |
|               | reverse | GGCTGGAAAGAAGTCTGAGGAA      |
| <i>Acta2</i>  | forward | GGCACCCTGAACCCTAAGG         |
|               | reverse | ACAATACCAGTTGTACGTCCAGA     |
| <i>Mmp2</i>   | forward | CGCTGCGCTTTTCTCGAATC        |
|               | reverse | CGGACCACTTGCCTTCTCC         |
| <i>Mmp9</i>   | forward | AGTACTCTTCCTGTACCAGCG       |
|               | reverse | TCGAGGTAGCTATACAGCGG        |
| <i>GAPDH</i>  | forward | ATGTGTCCGTCGTGGATCTG        |
|               | reverse | AAGGAGTAAGAAACCCTGGACC      |
| <i>Smad2</i>  | forward | AAGCCATCACCACTCAGAATTG      |
|               | reverse | CACTGATCTACCGTATTTGCTGT     |
| <i>Smad3</i>  | forward | CACAGCCACCATGAATTACG        |
|               | reverse | TGGAGGTAGAACTGGCGTCT        |
| <i>Smad4</i>  | forward | ACACCAACAAGTAACGATGCC       |
|               | reverse | AGCCACCTGAAGTCGTCCA         |
| <i>Smad7</i>  | forward | GGGCTTTCAGATTCCCAACTT       |
|               | reverse | AGGGCTCTTGGACACAGTAGA       |
| <i>Msg1</i>   | forward | ACTAGCTCCTCTGGATCGACA       |
|               | reverse | GACCCAGTTTTGCATGGGC         |
| <i>Strap</i>  | forward | GCATCACGCCTTACGGCTA         |
|               | reverse | AATCCAGTCTCCTGTATCTCCC      |
| <i>Smurf1</i> | forward | AGCATCAAGATCCGTCTGACA       |
|               | reverse | CCAGAGCCGTCCACAACAAT        |
| <i>Smurf2</i> | forward | CCATTTGCTAAGGTGGTAGTTGA     |
|               | reverse | CAGGTCATAATGCTGATTCCACT     |
| <i>Tob</i>    | forward | ATATGAAGGGCACTGGTATCCT      |
|               | reverse | GGATGCCTGCTCGATCACG         |

|              |         |                        |
|--------------|---------|------------------------|
| <i>Snon</i>  | forward | ACGCTGGCACAATTCCACTTA  |
|              | reverse | AGTCGGTGACATGCTCTCCT   |
| <i>C-Myc</i> | forward | ATGCCCTCAACGTGAACTTC   |
|              | reverse | GTCGCAGATGAAATAGGGCTG  |
| <i>Evi1</i>  | forward | AAGTAATGAGTGTGCCTATGGC |
|              | reverse | AGTTGACTCTCGAAGCTCAAAC |
| <i>Zeb2</i>  | forward | CCACGCAGTGAGCATCGAA    |
|              | reverse | CAGGTGGCAGGTCATTTTCTT  |
| <i>Cbp</i>   | forward | GGCTTCTCCGCGAATGACAA   |
|              | reverse | GTTTGGACGCAGCATCTGGA   |
| <i>Tnc</i>   | forward | ACGGTACCACAGAAGCTG     |
|              | reverse | ATGGCTGTTGTTGCTATGGCA  |
| <i>Fn1</i>   | forward | CAAGACCATACCTGCCGAATG  |
|              | reverse | GTAGGTGACCCCTCTGGTAAG  |
| <i>Tagln</i> | forward | CCAACAAGGGTCCATCCTACG  |
|              | reverse | ATCTGGGCGGCCTACATCA    |
| <i>Ctgf</i>  | forward | GGGCCTCTTCTGCGATTTC    |
|              | reverse | ATCCAGGCAAGTGCATTGGTA  |
